# Supplementary material
Source: Springer Nature journal article supplement (https://www.springermedizin.de/resource/supplementary/12936_2010_1210_MOESM7_ESM.pdf/9549216)

Number of Type 7 repeats

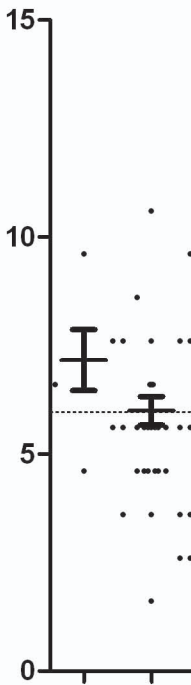

Country

Supplement: MOESM7 [file 9549216]
